# Supplementary material for: Dose-dependent impact of statin therapy intensity on circulating progenitor cells in patients undergoing percutaneous coronary intervention for the treatment of acute versus chronic coronary syndrome
Source: PLOS journal article supplement (doi:10.1371/journal.pone.0267433), 2022-05-19
Supplement: S2 (10.1371/journal.pone.0267433.s002) [file journal.pone.0267433.s002]

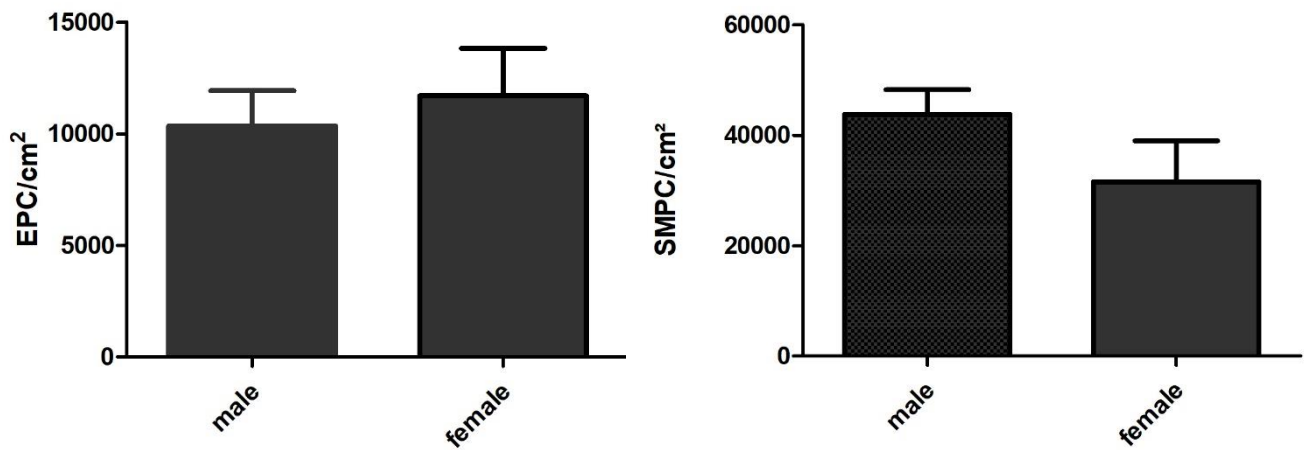

**Figure S2. EPC/cm<sup>2</sup> (left) and SMPC/cm<sup>2</sup> (right) in males and females.** No significant difference was observed between genders on EPC and SMPC counts.
